CORRECTION

## Correction: Simulation insights on the compound action potential in multifascicular nerves

The *PLOS Computational Biology* Staff

### Notice of republication

This article was republished on December 23, 2025, to correct an error in the first author's name in the XML version of the article. The author's name was incorrectly indexed as James Tharayil J. The correct name is Joseph James Tharayil, and the correct citation is: Tharayil JJ, Zinno C, Agnesi F, Lloyd B, Farcito S, Cassara A, et al. (2025) Simulation insights on the compound action potential in multifascicular nerves. *PLOS Computational Biology* 21(9): e1013452. <https://doi.org/10.1371/journal.pcbi.1013452>

The copyright statement in the XML version of the article has also been updated to include the corrected author name. These errors affected the article's indexing in PubMed. The PDF version of the article was correct at the time of original publication. The publisher apologizes for the errors.

### Reference

1. Tharayil JJ, Zinno C, Agnesi F, Lloyd B, Farcito S, Cassara A, et al. Simulation insights on the compound action potential in multifascicular nerves. *PLoS Comput Biol*. 2025;21(9):e1013452. <https://doi.org/10.1371/journal.pcbi.1013452> PMID: 40938942

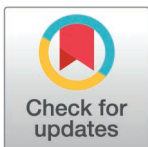

### OPEN ACCESS

**Citation:** The *PLOS Computational Biology* Staff (2026) Correction: Simulation insights on the compound action potential in multifascicular nerves. *PLoS Comput Biol* 22(1): e1013902. <https://doi.org/10.1371/journal.pcbi.1013902>

**Published:** January 20, 2026

**Copyright:** © 2026 The *PLOS Computational Biology* Staff. This is an open access article distributed under the terms of the [Creative Commons Attribution License](https://creativecommons.org/licenses/by/4.0/), which permits unrestricted use, distribution, and reproduction in any medium, provided the original author and source are credited.
